# Supplementary material for: Substantial Variation in the Extent of Mitochondrial Genome Fragmentation among Blood-Sucking Lice of Mammals
Source: PubMed Central journal article supplement — Genome Biol Evol. 2013 Jun 18;5(7):1298–308. doi: 10.1093/gbe/evt094 (PMC3730346; doi:10.1093/gbe/evt094), 2013-06-18
Supplement: supp_evt094_Jiang_et_al._Supplementary_material.pdf [file supp_evt094_Jiang_et_al._Supplementary_material.pdf]

## Supplementary material

**Table S1.** PCR primers used to amplify and sequence the mitochondrial genomes of the domestic pig louse, *Haematopinus suis*, and the wild pig louse, *Haematopinus apri*

| <b>Primer</b> | <b>Target gene or region</b> | <b>Sequence (5' to 3')</b>      |
|---------------|------------------------------|---------------------------------|
| mtd6          | <i>cox1</i>                  | GGAGGATTTGGAAATTGATTAGTTCC      |
| mtd11         | <i>cox1</i>                  | ACTGTAAATATATGATGAGCTCA         |
| 12SA          | <i>rrnS</i>                  | TACTATGTTACGACTTAT              |
| 12SB          | <i>rrnS</i>                  | AAACTAGGATTAGATACCC             |
| PGC1F         | <i>cox1</i>                  | GGTTTTAGCGGGTGGGATTACTATATTGT   |
| PGC1R         | <i>cox1</i>                  | GGCAAAGAAAGTAACAGTAGGACAGCAGT   |
| PG12SF        | <i>rrnS</i>                  | TTTGTACACCGCTGTCGGAAGGTTGTGGA   |
| PG12SR        | <i>rrnS</i>                  | GACGTGCATTATCGATTACAAACATGGGT   |
| PGseqF1       | <i>rrnS</i>                  | TGTACTTTTCATAGGAGTTATTTTCTATGA  |
| PGseqF2       | <i>rrnS</i>                  | ATTGGGATGGTTTTACCCCAATTTTGGGG   |
| PGseqF3       | <i>cox1</i>                  | ACACTTCTTAGGTTTGAGAGGCATGCCACG  |
| PGseqR1       | <i>rrnS</i>                  | TTGGGCAATTTATAGCCCACTGTCGACTAC  |
| PGseqR2       | <i>cox1</i>                  | GCTGATATGAAGGTGTGTATCCGTCGATAG  |
| PLF1          | Non-coding region            | GGAAGAGCATTTCGACGATTGTTACTTTAAC |
| PLR           | Non-coding region            | TAGCGATTTCTAAAAATCGTTATTGATCG   |

**Table S2.** PCR primers used to verify each mitochondrial minichromosome of the domestic pig louse, *Haematopinus suis*, and the wild pig louse, *Haematopinus apri*

| <b>Primer</b> | <b>Target gene or region</b> | <b>Sequence (5' to 3')</b>      |
|---------------|------------------------------|---------------------------------|
| HS12SF        | <i>rrnS</i>                  | GGTCCATGAAAACATAATAACATATGGCGGT |
| HS12SR        | <i>rrnS</i>                  | AACCATTACTACCTTGATATGATACTTACG  |
| HSCBF         | <i>cob</i>                   | GGAGCAACTGTAATTACAAATTTGCTATCT  |
| HSCBR         | <i>cob</i>                   | GGTAAAACATAACCTAAGAATGCTGTTGCC  |
| HSND1F        | <i>nad1</i>                  | GCAACAGAGCGAATTGCCCCCATAGTTCTA  |
| HSND1R        | <i>nad1</i>                  | TCAATCTCTCTCATTTCGAGATTACATTTAG |
| HSND1F1       | <i>nad1</i>                  | GGGTGTATACCGAATAGAAGCCTAAGTTTG  |
| HSND1R1       | <i>nad1</i>                  | TTCTTATGGATTACAACCTCCATTTCTTTCC |
| HSND2F        | <i>nad2</i>                  | GCTGGGGTAATAGTATCCTTACCTAGGTCT  |
| HSND2R        | <i>nad2</i>                  | AATCCGACGAATTGACAGATCAATTGAACC  |
| HSCX1F        | <i>cox1</i>                  | CCAGAGCAACTATGGTTATTGCCATTCCCA  |
| HSCX1R        | <i>cox1</i>                  | ATCCATCCCTACTGTAAACATACGGTGTGC  |
| HSND4LF       | <i>nad4L</i>                 | GGGTAATGTTGGCAATGAGGGTTACTCACT  |
| HSND4LR       | <i>nad4L</i>                 | AGACAGAACTACCATTCTACACCTTGAAGC  |
| HSND4LF2      | <i>nad4L</i>                 | GGCAATGAGGGTTACTCACTATTGAATTGT  |
| HSND4LR2      | <i>nad4L</i>                 | CAGATAAAGACAGAACTACCATTCTACACC  |
| HSCX3F        | <i>cox3</i>                  | GCCGATAGTGTATGTGGTTCATTGTTTTAC  |
| HSCX3R        | <i>cox3</i>                  | CCTCAAACCTGAAACATAACAAACAACACTC |
| HSCX2F        | <i>cox2</i>                  | GGATTCCTTGTTTCGCCTTTTGAAGTAGA   |
| HSCX2R        | <i>cox2</i>                  | TGACTTAACATGTATGAATCAAACCTCC    |
| HS16SF        | <i>rrnL</i>                  | CCTGCTCACTGCGTTGATAACGTAAATAGC  |
| HS16SR        | <i>rrnL</i>                  | TTAGTAAACAGTCAGACTAATTATTTGCCG  |

|          |              |                                    |
|----------|--------------|------------------------------------|
| HSND5F   | <i>nad5</i>  | GGAGTATCAGCACTTTGTGAAGTGGATTTA     |
| HSND5R   | <i>nad5</i>  | ATTGACACTACCTTAAGTGCTTGTAACACC     |
| HSATP6F  | <i>atp6</i>  | GGCTCTAATTCAGGCTTATGTGTTTCATAAG    |
| HSATP6R  | <i>atp6</i>  | CAGCAAGAGTAATTACTIONTATGTGACCTGCTG |
| HA12SF   | <i>rrnS</i>  | GGTCCATGAAAATAATAACATATGGCGGT      |
| HA12SR   | <i>rrnS</i>  | CATTGTATATAGTAGGGTATCTAATCCTAG     |
| HAND1F1  | <i>nad1</i>  | GGGTGTATACCGAATAGAAGCCTAAGTTTG     |
| HAND1R1  | <i>nad1</i>  | TTCTTATGGATTACAACCTCCATTTCTTCC     |
| HAND4LF  | <i>nad4L</i> | GGGTAATATTGGCAATGAGGGTTACTCATT     |
| HAND4LR  | <i>nad4L</i> | AGACAAAATACTACCATTCTACATCTTGATGC   |
| HAND6F   | <i>nad6</i>  | CCTAATCCGGATTTAGGTGTTTTTAATAGA     |
| HAND6R   | <i>nad6</i>  | TGAGTAACCCTCATTGCCAATATTACC        |
| HAND4LF1 | <i>nad4L</i> | CCTTAGGTTTGACCATTCTTGTTTCGACGA     |
| HAND4LR1 | <i>nad4L</i> | AATGATCTTGGGTAAACAAGAAAAAGG        |
| HAND2F   | <i>nad2</i>  | GGTTC AATTGATCTGTCAATTCGTCGTATT    |
| HAND2R   | <i>nad2</i>  | TAACATCACTACAACCGTTCCTCC           |
| HACX1F   | <i>cox1</i>  | GCATATAATTATGGAGGAGAGAGGAA         |
| HACX1R   | <i>cox1</i>  | ATGACCAAAAAACCAGAATAGATGCTGG       |
| HA16SF   | <i>rrnL</i>  | GGTTTTACAAGACTAAGTCTGTCTCTGTGA     |
| HA16SR   | <i>rrnL</i>  | TACTGCAGCTATTTACGTTATCAACG         |
| HAND4F1  | <i>nad4</i>  | CCACTCTTTCTTACACACTCCTGATTA        |
| HAND4R1  | <i>nad4</i>  | AAGGCTACTATTAATCCTAATGAGGAC        |
| HAATP6F  | <i>atp6</i>  | CAGCAGGTCACATAGTAATTACTIONTCTT     |
| HAATP6R  | <i>atp6</i>  | TTAAACTAATTGGCCGAATAACCAACC        |
| HAND5F   | <i>nad5</i>  | GGTAGCTCTTTCTACACTGACCCATTTA       |

---

|        |             |                                |
|--------|-------------|--------------------------------|
| HAND5R | <i>nad5</i> | ATCCACCTCACAAAGTGCTGACACTCCTGC |
| HACBF  | <i>cob</i>  | CGACTTTAGTACGGTTCTTTTCGTTTCATT |
| HACBR  | <i>cob</i>  | ATTCCTACAGAAAAACCTCCCCACAACC   |
| HACX2F | <i>cox2</i> | GAGCAGGACTGCCAGCTATTTCTTTA     |
| HACX2R | <i>cox2</i> | AAAGTCTCTGCACTTACAAGAAAACGG    |
| HACX3F | <i>cox3</i> | GGAGTACCGTTTTTTGAATACTATGATCTT |
| HACX3R | <i>cox3</i> | ATATAATTCAAAGGCTGAATACCTACAGG  |

---

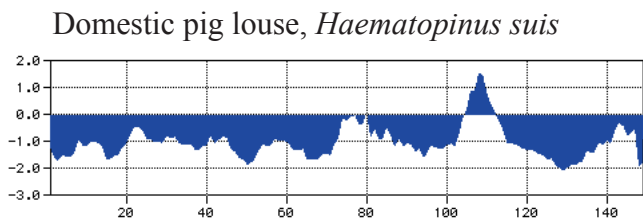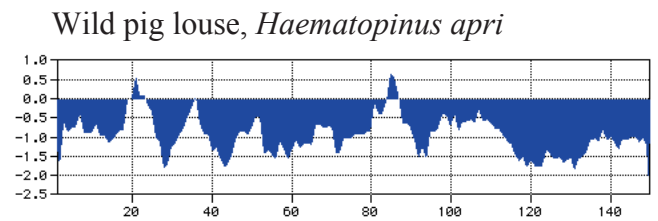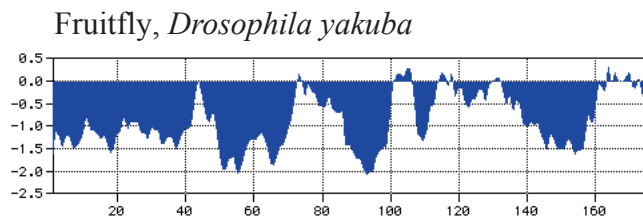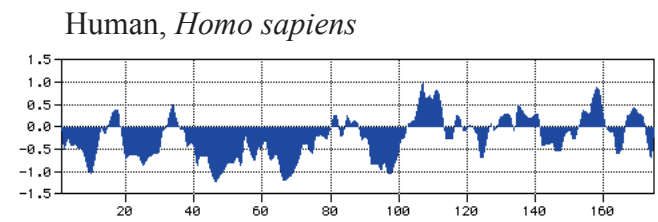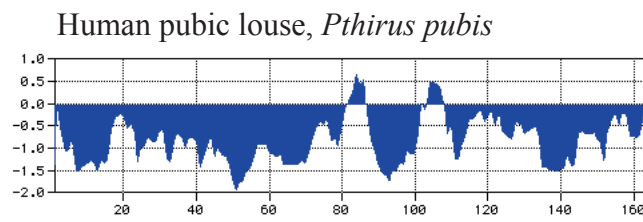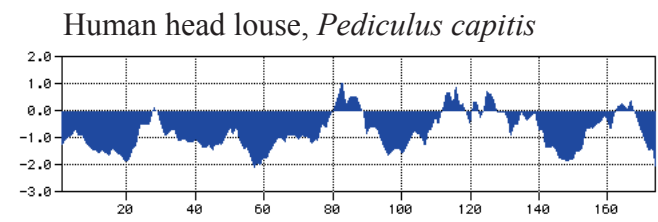

Fig. S1. Hopp/Woods hydrophilicity profiles of NAD6 proteins of *Haematopinus suis* and *H. apri* with four other animals. Amino acids are along the horizontal lines. Hydrophilicity values of amino acids are along the vertical lines.

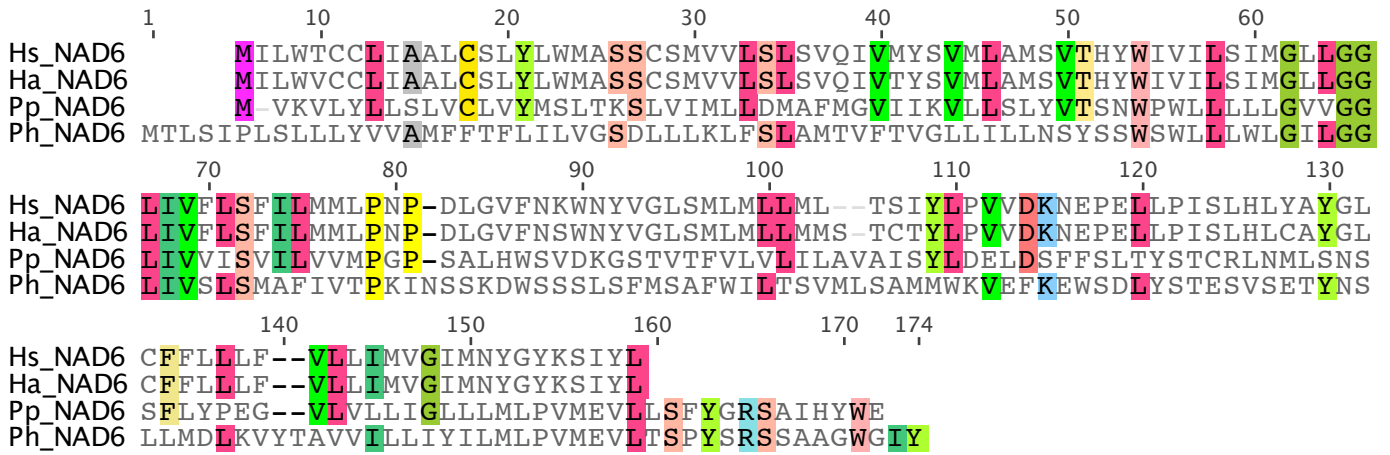

Fig. S2. Alignment of the putative amino acid sequences of mitochondrial NAD6 proteins of sucking lice. Conserved amino acid sequences were highlighted in colors. Abbreviations of species names are: Hs – *Haematopinus suis* (domestic pig louse), Ha – *Haematopinus apri* (wild pig louse), Pp – *Pthirus pubis* (human pubic louse), and Ph – *Pediculus humanus* (human body louse). Alignment was with Geneious 6.1.2 (Kearse et al. 2012). BLOSUM cost matrix was used; gap open cost was 10 and gap extend cost was 6.6.
